# Supplementary material for: Enhanced Poly(Propylene Carbonate) with Thermoplastic Networks: A One-Pot Synthesis from Carbon Dioxide, Propylene Oxide, and a Carboxylic Dianhydride
Source: MDPI journal article supplement (doi:10.3390/polym10050552), 2018-05-21
Supplement: s1 [file s1]

## Supporting Information for

### Enhanced poly(propylene carbonate) with thermoplastic networks: A one-pot synthesis from carbon dioxide, propylene oxide and a carboxylic dianhydride

Xianggen Chen<sup>1,2</sup>, Lingyun Wang<sup>2</sup>, Jiuying Feng<sup>1</sup>, Xianling Huang<sup>1</sup>, Xiuzhi Guo<sup>1</sup>, Jing Chen<sup>1</sup>, Zhenyuan Xiao<sup>1</sup>, Xiangjun Liang<sup>1</sup> and Lijun Gao<sup>1,\*</sup>

<sup>1</sup> School of Chemistry and Chemical Engineering, Resource and Chemical Engineering Technology Research Center of Western Guangdong Province, Lingnan Normal University, Zhanjiang, P. R. China. 524048;

<sup>2</sup> Key Laboratory of Functional Molecular Engineering of Guangdong Province, School of Chemistry and Chemical Engineering, South China University of Technology, Guangzhou, P. R. China. 510641;

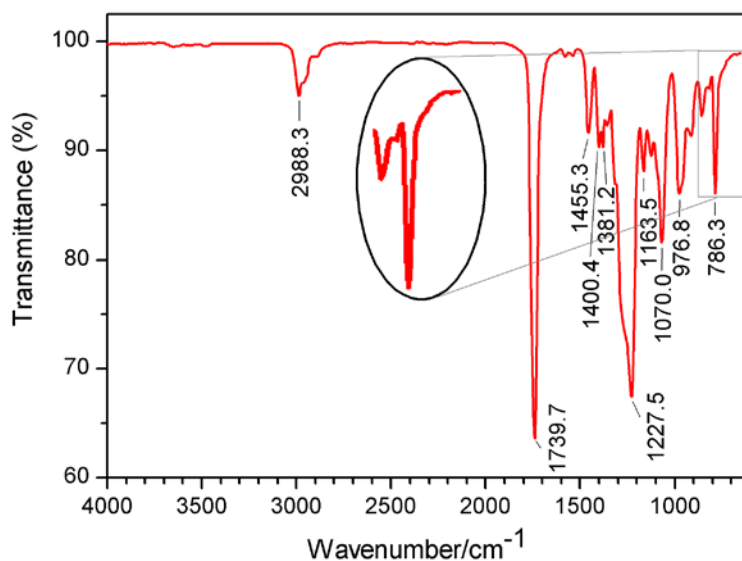

Figure S1. The FT-IR spectrum of PPC.

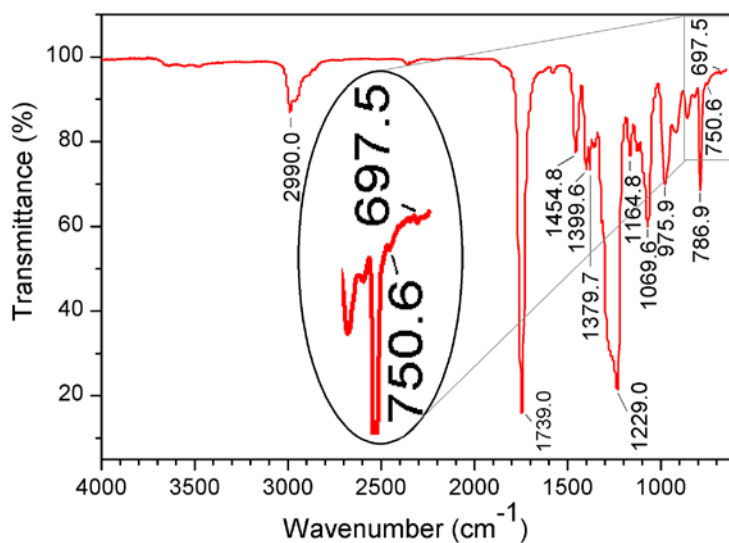

Figure S2. The FT-IR spectrum of PPC-3.

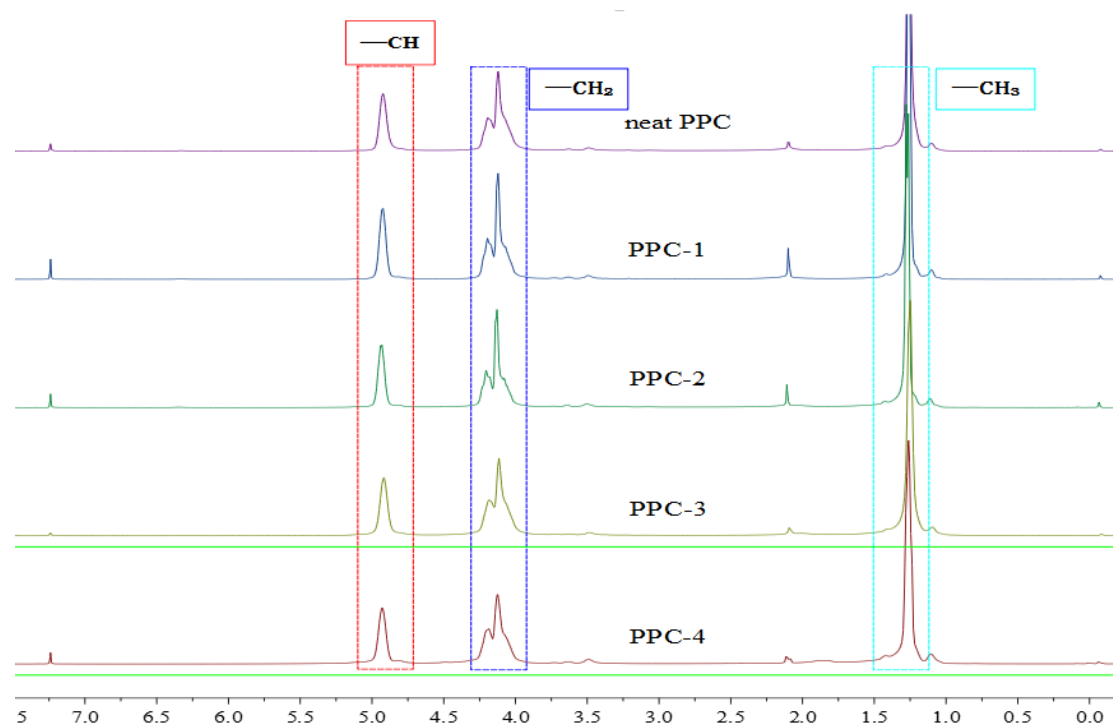

**Figure S3.** The  $^1\text{H}$  NMR spectra of PPC and PPC with networks.

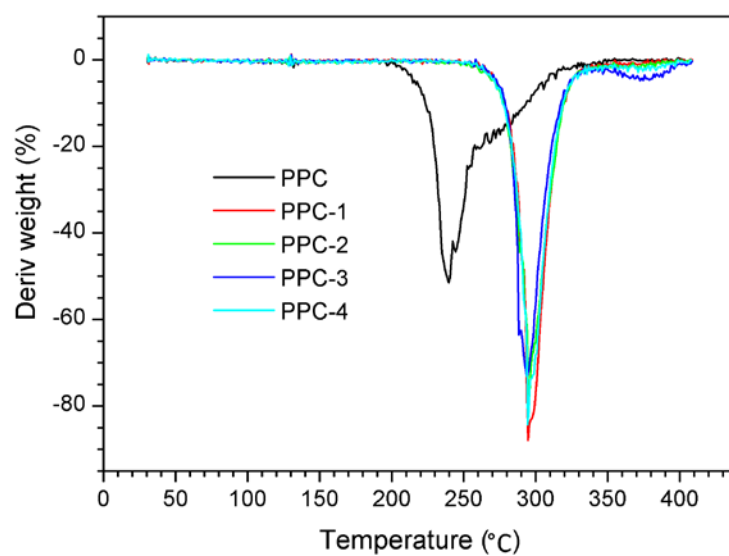

**Figure S4.** The DTG curves for PPC and PPC with networks.

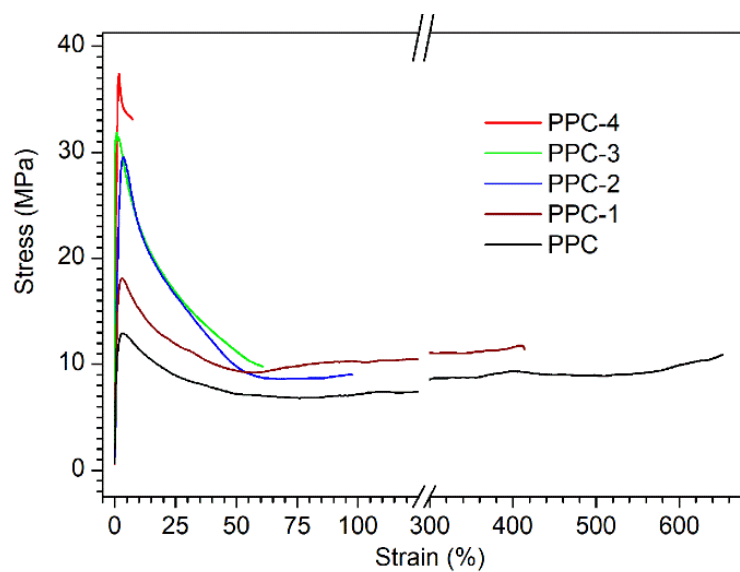

**Figure S5.** The strain-stress curves for PPC and PPC with networks.

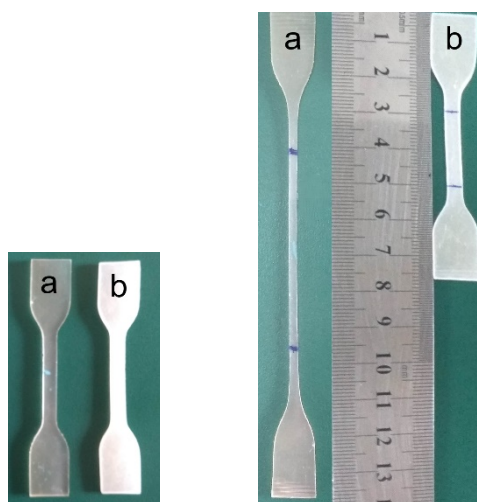

**Figure S6.** The photos of dumbbell-shaped specimens before (left) and after (right) hot-set test. (a) PPC, (b) PPC-4. The right photo is permanent deformation result.
